# Supplementary material
Source: PubMed Central journal article supplement (PMC4260972)
Supplement: NIHMS633323-supplement-2.pdf [file NIHMS633323-supplement-2.pdf]

**Branched Fatty Acid Esters of Hydroxy  
Fatty Acids: Endogenous Anti-Diabetic and  
Anti-inflammatory Lipids**

Mark M. Yore<sup>\*a</sup>, Ismail Syed<sup>\*a</sup>, Pedro M. Moraes-Vieira<sup>\*</sup>, Tejia Zhang<sup>^</sup>, Mark A. Herman<sup>\*</sup>,  
Edwin Homan<sup>^</sup>, Rajesh T. Patel<sup>†</sup>, Jennifer Lee<sup>\*</sup>, Shili Chen<sup>^</sup>, Odile D. Peroni<sup>\*</sup>, Abha  
Dhaneshwar<sup>\*</sup>, Ann Hammarstedt<sup>†</sup>, Ulf Smith<sup>†</sup>, Timothy E. McGraw<sup>†</sup>, Alan Saghatelian<sup>^b</sup>  
and Barbara B. Kahn<sup>\*b</sup>

<sup>\*</sup>Division of Endocrinology, Diabetes & Metabolism, Department of Medicine, Beth Israel  
Deaconess Medical Center and Harvard Medical School, Boston, MA 02215.

<sup>†</sup>Department of Biochemistry, Weill Cornell Medical College, New York, NY 10065.

<sup>^</sup>Department of Chemistry and Chemical Biology, Harvard University, Cambridge, MA  
02138.

<sup>†</sup>Department of Molecular and Clinical Medicine, the Sahlgrenska Academy, University  
of Gothenburg, Gothenburg, Sweden.

<sup>a,b</sup> same letter denotes equal contribution.

Address correspondence to Barbara B. Kahn at [bkahn@bidmc.harvard.edu](mailto:bkahn@bidmc.harvard.edu) or Alan  
Saghatelian at [asaghatelian@salk.edu](mailto:asaghatelian@salk.edu)

Current address for Tejia Zhang, Shili Chen and Alan Saghatelian: Salk Institute for  
Biological Studies, Torrey Pines Road, La Jolla, CA 92037.

## Extended experimental procedures

### PAHSA Synthesis

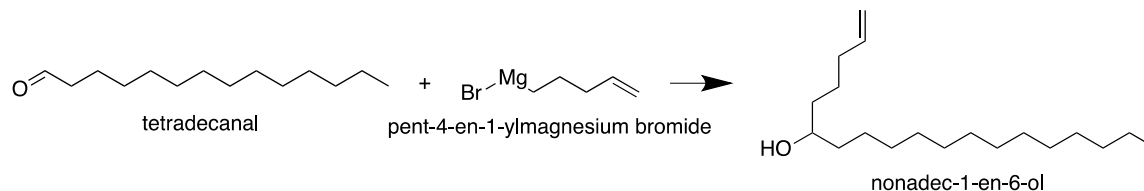

### General materials.

Glassware was oven dried for at least 24 hours before use and the reactions were carried out under an atmosphere of nitrogen. Analytical thin-layer chromatography (TLC) was performed on precoated silica gel F-254 plates and visualized by phosphomolybdic acid stain (PMA). Flash chromatography was performed using 230-400 mesh silica gel from EMD.  $^1\text{H}$  NMR spectra were performed at 400 MHz.

**Synthesis of nonadec-1-en-6-ol.** To a stirred solution of tetradecanal (1.5 g, 7.1 mmoles, 1 eq) in THF (50 mL) on an ice bath was added pent-4-en-1-ylmagnesium bromide (21.2 mL, 10.6 mmoles, 1.5 eq, 0.5 M solution in THF) by syringe. The solution stirred overnight (16 hours) and over this time warmed to room temperature. The reaction was quenched by the addition of a saturated solution of ammonium chloride (1 mL), concentrated onto celite 545 (10 g), and purified by silica gel chromatography (15% EtOAc/hexanes). Pure fractions were combined and concentrated to afford a white solid (570 mg, 28%);  $R_f = 0.17$ , 10% EtOAc/hexanes;  $^1\text{H}$  NMR (400 MHz,  $\text{CDCl}_3$  (7.26 ppm)): 5.846-5.761 (m, 1H), 5.022-4.920 (m, 2H), 3.584 (s, 1H), 2.070-2.055 (d, 2H), 1.42-1.24 (m, 29H), 0.863 (t, 3H);  $m/z$  (ESI+) found  $[\text{MNH}_4^+]$   $\text{C}_{19}\text{H}_{42}\text{NO}^+$ , 300.3259; calculated for  $\text{C}_{19}\text{H}_{42}\text{NO}^+$ : 300.3261,  $\Delta\text{PPM} = 0.67$ .

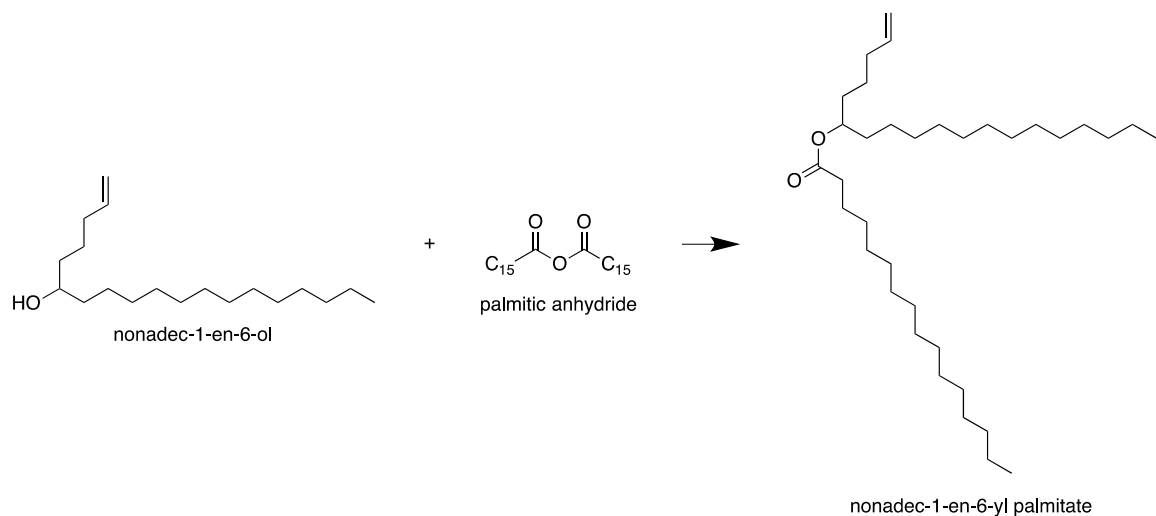

**Synthesis of nonadec-1-en-6-yl palmitate.** To a stirred solution of nonadec-1-en-6-ol (570 mg, 2 mmoles, 1 eq) in CH<sub>2</sub>Cl<sub>2</sub> (20 mL) was added palmitic anhydride (1.2 g, 2.4 mmoles, 1.2 eq), 4-(dimethylamino)pyridine (122 mg, 1 mmole, 0.5 eq), and triethylamine (1.1 mL, 8 mmole, 4 eq). The solution stirred overnight (16 hours) at room temperature. The reaction was concentrated onto celite 545 (10 g), and purified by silica gel chromatography (10% EtOAc/hexanes). Pure fractions were combined and concentrated to afford a clear, colorless, oil (750 mg, 71%); R<sub>f</sub> = 0.33, 15% EtOAc/hexanes; <sup>1</sup>H NMR (400 MHz, CDCl<sub>3</sub> (7.26 ppm)): 5.846-5.761 (m, 1H), 5.022-4.920 (m, 2H), 3.584 (s, 1H), 2.070-2.055 (d, 2H), 1.42-1.24 (m, 29H), 0.863 (t, 3H); m/z (ESI+) found [MH<sup>+</sup>] C<sub>35</sub>H<sub>69</sub>O<sub>2</sub><sup>+</sup>, 521.5302; calculated for C<sub>35</sub>H<sub>69</sub>O<sub>2</sub><sup>+</sup>: 521.5292, ΔPPM = 1.92.

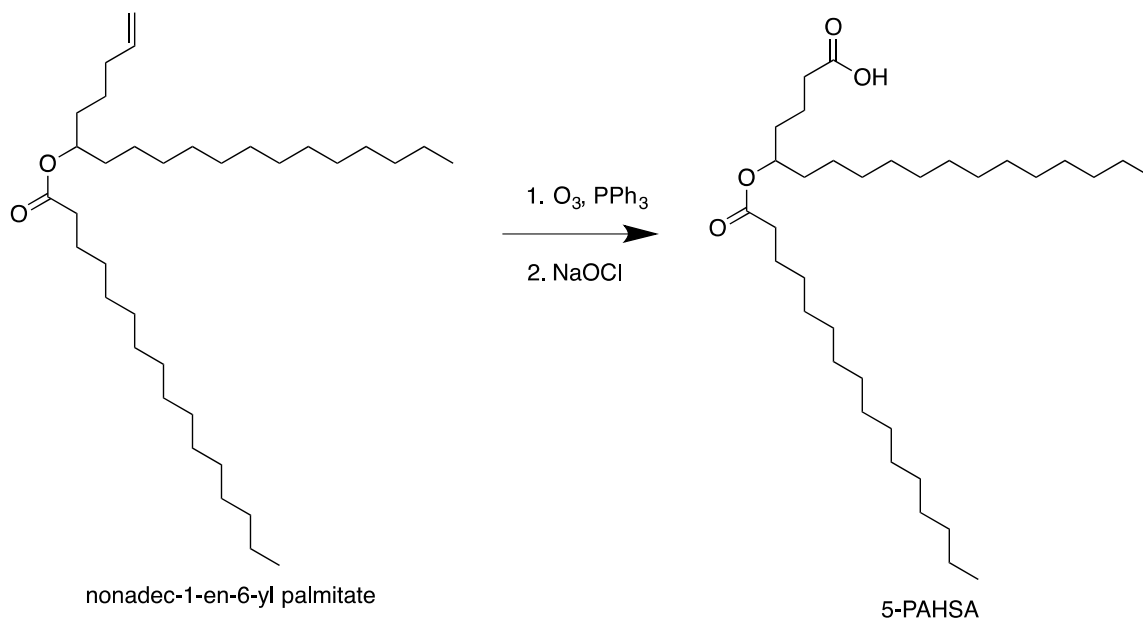

**Synthesis of 5-PAHSA.** Ozone was bubbled into a stirred solution of nonadec-1-en-6-yl palmitate (104 mg, 0.2 mmoles, 1 eq) in CH<sub>2</sub>CL<sub>2</sub> (20 mL) at -78 °C until the solution turned blue. Nitrogen was then bubbled into the reaction until it was colorless and triphenyl phosphine (104 mg, 0.4 mmole, 2 eq) was added and the reaction warmed to room temperature. After 2 hours, the solution was concentrated. Sodium hypochlorite (112 mg of an 80% grade stock, 1 mmole, 5 eq.), sodium phosphate monobasic (138 mg, 1 mmole, 5 eq.), 2 methylbut-2-ene (1.6 mL, 16 mmole, 80 eq.), water (3.6 mL) and tert-butanol (14 mL) were added and the reaction stirred overnight. The reaction was concentrated and taken up in methylene chloride and then washed with 10% HCl in a separatory funnel. The organic layer was dried with sodium sulfate, filtered and then concentrated using a rotovap. A waxy solid bordering on an oil remained in the flask. This residue was dissolved in a minimal amount of ethyl acetate and the purified by silica gel chromatography (20% EtOAc/hexanes). Pure fractions were combined and concentrated to afford a white solid (750 mg, 71%); R<sub>f</sub> = 0.33, 15% EtOAc/hexanes; <sup>1</sup>H NMR (400 MHz, CDCl<sub>3</sub> (7.26 ppm)): 5.846-5.761 (m, 1H), 5.022-4.920 (m, 2H), 3.584 (s, 1H), 2.070-2.055 (d, 2H), 1.42-1.24 (m, 29H), 0.863 (t, 3H); m/z (ESI+) found [MH]<sup>+</sup> C<sub>34</sub>H<sub>65</sub>O<sub>4</sub><sup>+</sup>, 537.4905; calculated for C<sub>34</sub>H<sub>65</sub>O<sub>4</sub><sup>+</sup>: 537.4888, ΔPPM = 3.16.

The synthesis of 9-PAHSA was carried out using the same route except that the first step uses dec-9-enal and nonylmagnesium bromide for the Grignard addition. 9-hydroxy

heptadecanoic acid (HHA) was made in two steps by addition of octylmagnesium bromide to dec-9-enal, followed by ozonolysis to afford the hydroxy fatty acid.
