# Supplementary material
Source: PubMed Central journal article supplement (PMC4260972)

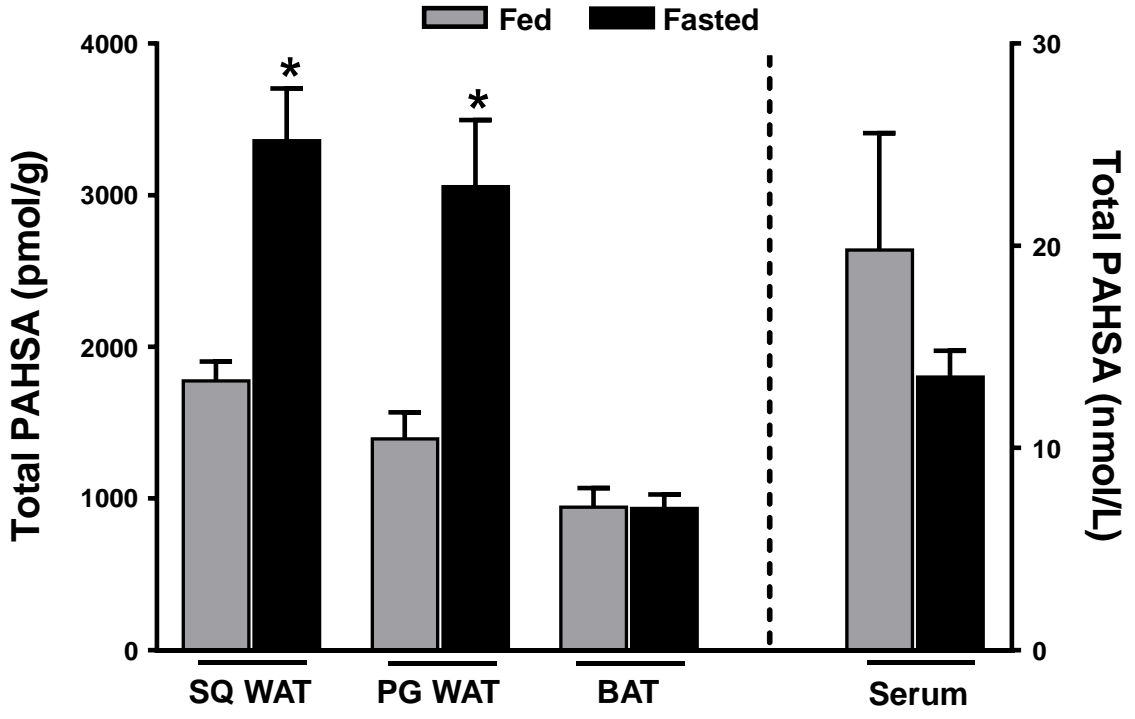

Supplement: NIHMS633323-supplement-3.pdf [file NIHMS633323-supplement-3.pdf]

A.

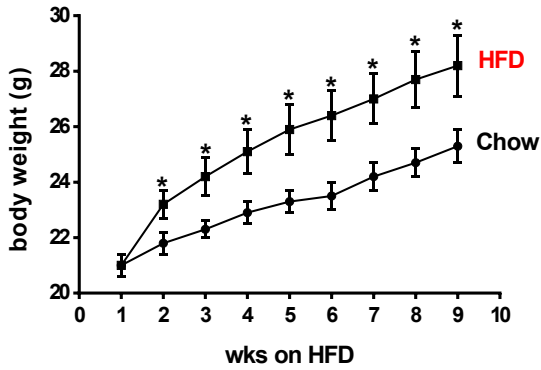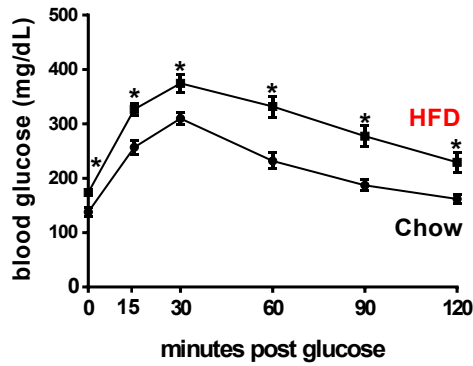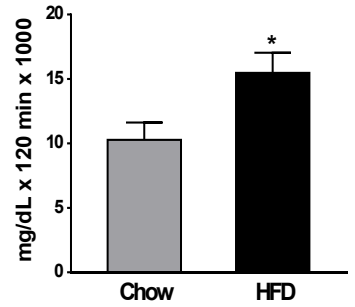

B.

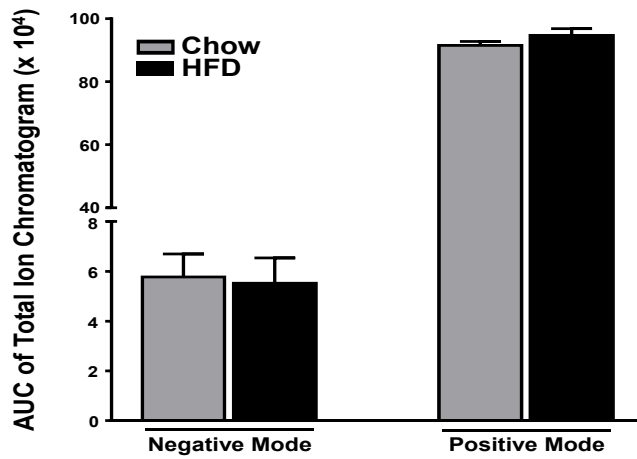

C.

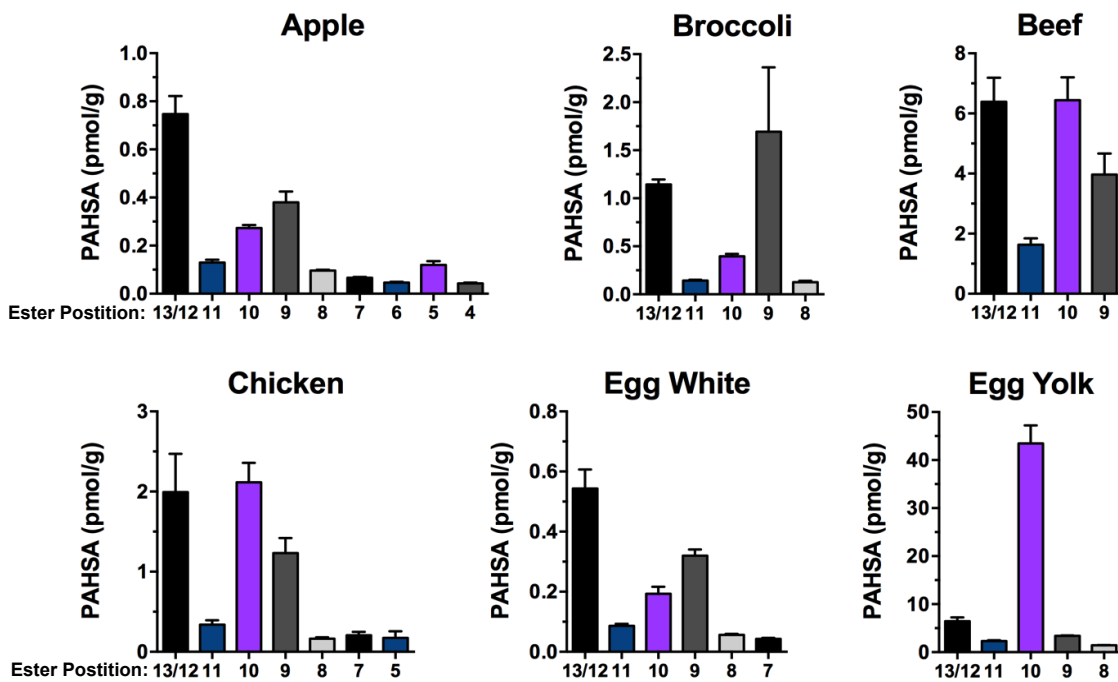

Supplement: NIHMS633323-supplement-4.pdf [file NIHMS633323-supplement-4.pdf]

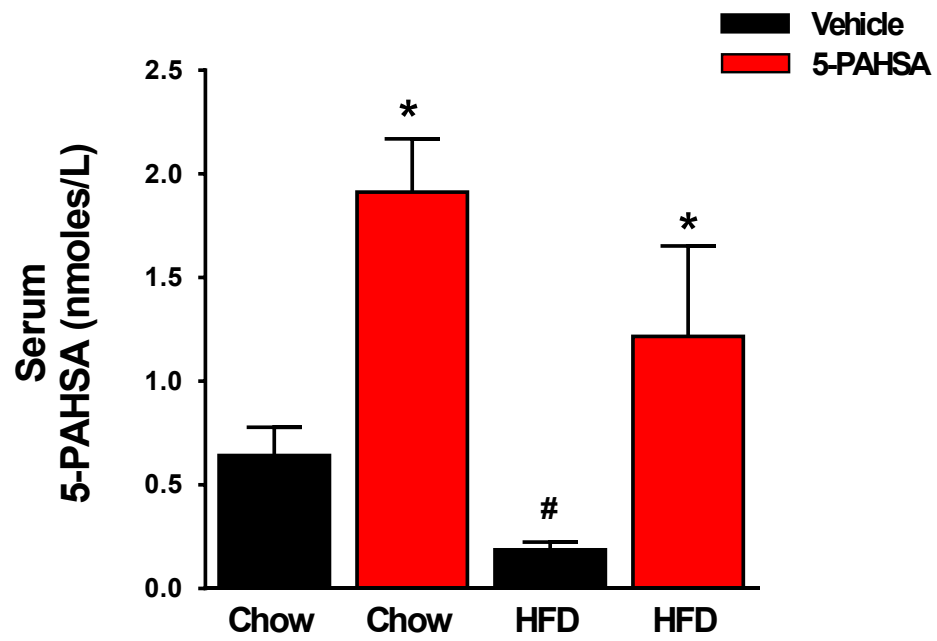

Supplement: NIHMS633323-supplement-5.pdf [file NIHMS633323-supplement-5.pdf]

A.

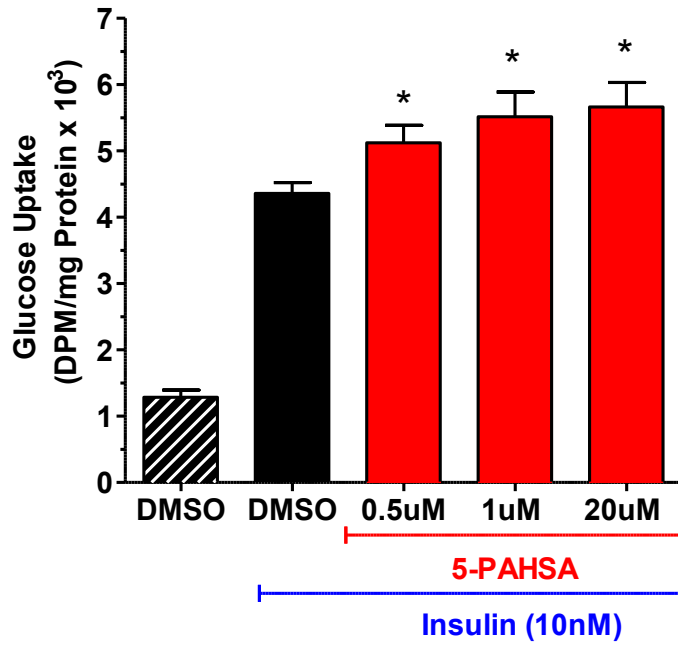

B.

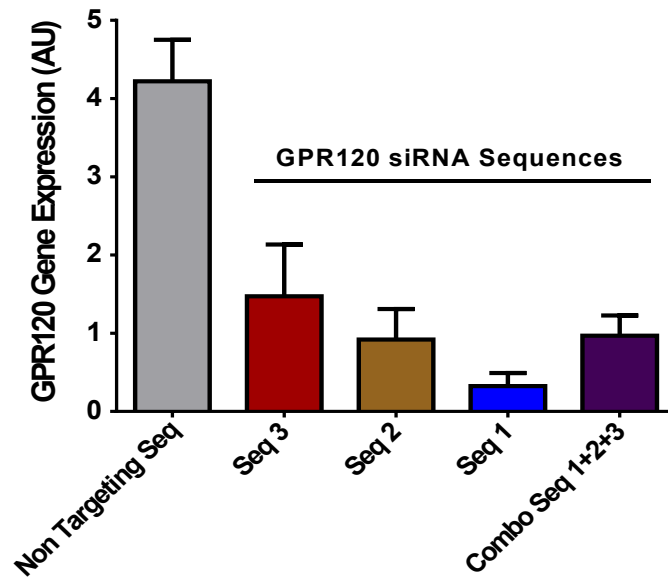

Supplement: NIHMS633323-supplement-6.pdf [file NIHMS633323-supplement-6.pdf]

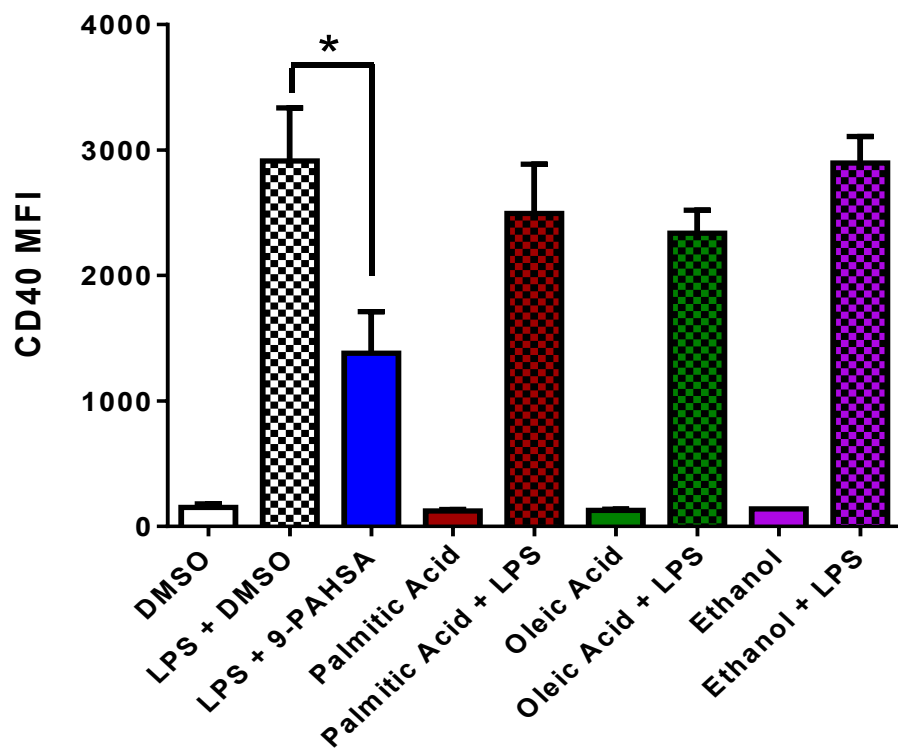

Supplement: NIHMS633323-supplement-7.pdf [file NIHMS633323-supplement-7.pdf]
